# Supplementary material
Source: PubMed Central journal article supplement (PMC3045813)
Supplement: NIHMS202633-supplement-Online_Table.pdf [file NIHMS202633-supplement-Online_Table.pdf]

Online Table. Variables at Time 1 and Time 2 with Means and Standard Deviations or Frequencies by Format

| Concept         | Item                                                                                           | Response*                                              | <u>AN</u>                    | <u>Plain</u>                 | <u>Graded</u>                |
|-----------------|------------------------------------------------------------------------------------------------|--------------------------------------------------------|------------------------------|------------------------------|------------------------------|
|                 |                                                                                                |                                                        | Mean <sup>Time 1</sup><br>SD | Mean <sup>Time 1</sup><br>SD | Mean <sup>Time 1</sup><br>SD |
|                 |                                                                                                |                                                        | Mean <sup>Time 2</sup><br>SD | Mean <sup>Time 2</sup><br>SD | Mean <sup>Time 2</sup><br>SD |
|                 |                                                                                                |                                                        | n=88                         | n=89                         | n=84                         |
| Safety belief   | How safe is your untreated water as your main water source for drinking?                       | Very safe, Very unsafe                                 | 3.59<br>1.151                | 4.19<br>1.107                | 3.98<br>1.232                |
|                 |                                                                                                |                                                        | 3.69<br>1.087                | 4.01<br>1.028                | 3.95<br>0.993                |
| Serious problem | How serious is the problem indicated by your test result?                                      | Very minor, Very serious                               | 3.56<br>1.173                | 3.87<br>1.025                | 3.81<br>1.103                |
|                 |                                                                                                |                                                        | 3.59<br>1.131                | 3.92<br>1.068                | 3.66<br>1.050                |
| Severity        | How serious would the health effects be from by long-term exposure to your level of manganese? | Very minor health effects, Very serious health effects | 3.98<br>1.313                | 3.93<br>1.286                | 3.90<br>1.248                |
|                 |                                                                                                |                                                        | 3.53<br>1.295                | 3.97<br>1.182                | 3.74<br>1.142                |
| Emotion         | How concerned do you feel about your test result?                                              | Very unconcerned – Very concerned                      | 3.91<br>1.131                | 4.34<br>0.953                | 4.12<br>1.134                |
|                 |                                                                                                |                                                        | 3.91<br>1.013                | 4.17<br>0.895                | 4.05<br>1.040                |
| Emotion         | How distressed do you feel about your test results?                                            | Very calm – Very distressed                            | 3.53<br>1.124                | 3.81<br>0.987                | 3.61<br>1.252                |
|                 |                                                                                                |                                                        | 3.43<br>0.980                | 3.76<br>0.966                | 3.65<br>0.963                |

Online Table (continued)

| <b>Concept</b>             | <b>Item</b>                                                                                      | <b>Response</b>                                 | <b><u>AN</u></b>             | <b><u>Plain</u></b>          | <b><u>Graded</u></b>         |
|----------------------------|--------------------------------------------------------------------------------------------------|-------------------------------------------------|------------------------------|------------------------------|------------------------------|
|                            |                                                                                                  |                                                 | Mean <sup>Time 1</sup><br>SD | Mean <sup>Time 1</sup><br>SD | Mean <sup>Time 1</sup><br>SD |
|                            |                                                                                                  |                                                 | Mean <sup>Time 2</sup><br>SD | Mean <sup>Time 2</sup><br>SD | Mean <sup>Time 2</sup><br>SD |
|                            |                                                                                                  |                                                 | n=88                         | n=89                         | n=84                         |
| Risk belief                | How skeptical do you feel about the potential for health risks at this manganese level?          | Very convinced, Very skeptical                  | 3.64<br>1.008                | 3.65<br>1.056                | 3.49<br>0.988                |
|                            |                                                                                                  |                                                 | 3.67<br>0.931                | 3.62<br>1.006                | 3.57<br>0.985                |
| Risk mitigation Intentions | Now that you have your well test result, how much of your untreated well water do plan to drink? | Drink as usual, Stop drinking<br>(5 categories) | 3.00<br>1.304                | 3.54<br>1.197                | 3.24<br>1.286                |
|                            |                                                                                                  |                                                 | 2.84<br>1.240                | 3.31<br>1.221                | 3.06<br>1.274                |

Online Table (continued)

| <b>Concept</b>                             | <b>Item</b>                                                                                       | <b>Response</b>                                                          | <b><u>AN</u></b>          | <b><u>Plain</u></b>       | <b><u>Graded</u></b>      |
|--------------------------------------------|---------------------------------------------------------------------------------------------------|--------------------------------------------------------------------------|---------------------------|---------------------------|---------------------------|
|                                            |                                                                                                   |                                                                          | Mean<br><i>SD</i><br>n=88 | Mean<br><i>SD</i><br>n=89 | Mean<br><i>SD</i><br>n=84 |
| <u>Time 1</u><br>Personal safety threshold | What is the highest manganese level you personally consider safe for your drinking water?         | 0, 1-4, 5-9, 10, 11-19, 20-29, 30-39, 40-49, 50, 51-59, 60-100, over 100 | 5.25<br>1.808             | 5.07<br>1.789             | 5.20<br>1.987             |
| <u>Time 1</u><br>Likelihood at 10-15 ppb   | How likely is it that 10 – 15 ppb manganese would cause health problems over a lifetime of use?   | Very unlikely, Very likely                                               | 3.38<br>1.244             | 3.53<br>1.289             | 3.52<br>1.303             |
| <u>Time 1</u><br>Likelihood at 35 - 50 ppb | How likely is it that 35 – 50 ppb manganese would cause health problems over a lifetime of use?   | Very unlikely, Very likely                                               | 4.66<br>1.163             | 4.76<br>1.066             | 4.62<br>1.251             |
| <u>Time 2</u><br>Likelihood your amount    | How likely is it that your level of manganese would cause health problems over a lifetime of use? | Very unlikely, Very likely                                               | 3.82<br>1.237             | 4.16<br>1.137             | 3.95<br>1.118             |

Online Table (continued)

| Concept       | Item                                                                                       | Response                                                                                           | <u>AN</u>                                                                                                      | <u>Plain</u>                   | <u>Graded</u>                  |                         |
|---------------|--------------------------------------------------------------------------------------------|----------------------------------------------------------------------------------------------------|----------------------------------------------------------------------------------------------------------------|--------------------------------|--------------------------------|-------------------------|
|               |                                                                                            |                                                                                                    | Percent<br>(Frequency)<br>n=88                                                                                 | Percent<br>(Frequency)<br>n=89 | Percent<br>(Frequency)<br>n=84 |                         |
| <u>Time 1</u> | Optimistic Threshold Bias (OTB)<br><i>Dichotomous version of personal safety threshold</i> | What is the highest manganese level you personally consider safe for your drinking water?          | Under, over<br>(% provided for under indicating bias – balance are under)                                      | 60.2% (53)                     | 61.8% (55)                     | 64.3% (54)              |
|               |                                                                                            |                                                                                                    | <sup>a</sup> 5.6% (5)                                                                                          | <sup>a</sup> 4.5% (4)          | <sup>a</sup> 6.0% (5)          |                         |
| <u>Time 1</u> | Dose/risk belief                                                                           | How would you compare the health risk of manganese at 40 ppb to the health risk at 20 ppb?         | 40 has <sup>a,b,c,d</sup> health risk as 20:                                                                   | <sup>b</sup> 37.5% (33)        | <sup>b</sup> 51.7% (46)        | <sup>b</sup> 39.3% (33) |
|               |                                                                                            |                                                                                                    | <sup>a</sup> about same, <sup>b</sup> a little more,<br><sup>c</sup> about twice, <sup>d</sup> more than twice | <sup>c</sup> 45.5% (40)        | <sup>c</sup> 36.0% (32)        | <sup>c</sup> 42.9% (36) |
|               |                                                                                            |                                                                                                    |                                                                                                                | <sup>d</sup> 11.4% (10)        | <sup>d</sup> 7.8% (7)          | <sup>d</sup> 11.8% (10) |
| <u>Time 2</u> | Under/over standard recall                                                                 | As you recall, was your manganese test result over or under the manganese drinking water standard? | Under, Over<br>(% provided for under indicating incorrect recall – balance are under)                          | 9.1% (8)                       | 16.9% (15)                     | 16.7% (14)              |
|               |                                                                                            |                                                                                                    |                                                                                                                | <sup>a</sup> 3.4% (3)          | <sup>a</sup> 4.5% (4)          | <sup>a</sup> 4.8% (4)   |
| <u>Time 2</u> | Dose recall                                                                                | Please circle your best guess of the range that your test result would be in?                      | <sup>a</sup> Under 10, <sup>b</sup> 10-50, <sup>c</sup> Over 50<br>(under 10 indicates bias)                   | <sup>b</sup> 94.3% (83)        | <sup>b</sup> 92.1% (82)        | <sup>b</sup> 92.9% (78) |
|               |                                                                                            |                                                                                                    |                                                                                                                | <sup>c</sup> 2.3% (2)          | <sup>c</sup> 3.4% (3)          | <sup>c</sup> 2.3% (2)   |

\*6 categories for response unless otherwise noted
